# Supplementary material
Source: PubMed Central journal article supplement (PMC8919203)
Supplement: zsab259_suppl_supplementary_material.pdf [file zsab259_suppl_supplementary_material.pdf]

## Supplemental Material

### **Abnormal REM Sleep Atonia Control in Chronic Post-Traumatic Stress Disorder and Possible Trauma-associated Sleep Disorder**

John C. Feemster,<sup>1-4</sup> Tyler A. Steele,<sup>1-4</sup> Kyle P. Palermo,<sup>1,5</sup> Christy A. Ralston,<sup>1,6</sup> Yumeng Tao,<sup>1,6</sup> David A. Bauer,<sup>1,5</sup> Liam Edgar,<sup>1</sup> Sonia Rivera,<sup>1</sup> Maxwell Walters-Smith,<sup>1</sup> Thomas R. Gossard,<sup>1-3</sup> Luke D. Teigen,<sup>1-3</sup> Paul C. Timm,<sup>1-3</sup> Jarrett W. Richardson,<sup>1-2,7</sup> R. Robert Auger,<sup>1-2,7</sup> Bhanuprakash Kolla,<sup>1-2,7</sup> Stuart J. McCarter, M.D.,<sup>1-4</sup> Bradley F. Boeve,<sup>1-2,4</sup> Michael H. Silber,<sup>1-2,4</sup> Erik K. St. Louis,<sup>1-4,8</sup>

From the Mayo Center for Sleep Medicine (1), Division of Pulmonary and Critical Care Medicine(2), Departments of Medicine (3), Neurology (4), and Psychiatry,(7) Mayo Clinic and Foundation, Rochester, Minnesota; Mayo Clinic Health System Southwest Wisconsin, La Crosse, Wisconsin (8); St. Olaf College, Northfield, MN (5); and Cornell College, Mount Vernon, Iowa (6)

#### **Correspondence to:**

Erik K. St. Louis, M.D., M.S.  
Mayo Center for Sleep Medicine  
Departments of Medicine and Neurology  
Mayo Clinic College of Medicine  
200 First Street Southwest  
Rochester, Minnesota 55905  
Phone: (507) 266-7456  
Fax: (507) 266-7772  
Email: [stlouis.erik@mayo.edu](mailto:stlouis.erik@mayo.edu)

### **Tables**

**Supplemental Table 1. Antecedent Traumatic Experiences in Patients with PTSD, Stratified by Patients with and without Dream Enactment Behavior (DEB).** There were no significant differences in traumatic experience histories between PTSD patients with or without DEB.

**Supplemental Table 2. Clinical Historical and Polysomnographic Characteristics of Patients with PTSD with and without Dream Enactment Behavior (DEB).**

**Supplemental Table 3. PTSD Patients with and without Dream Enactment Behavior (DEB) Meeting RBD or 95<sup>th</sup> Normative Percentile RSWA Criteria at the Time of PSG**

**Supplemental Table 4. Comparative Normative RSWA Percentiles Between PTSD Patients with and without Dream Enactment Behavior (DEB), Idiopathic/Isolated RBD Patients, and Controls.**

## **Figures**

**Supplemental Figure 1. Quantitative REM sleep (REM sleep without atonia) analyses Using the AASM Method for Determination of Phasic Muscle Activity in PTSD Patients with and without Dream Enactment Behavior, IRBD Patients, and Controls.**

**Supplemental Table 1. Antecedent Traumatic Experiences in Patients with PTSD, Stratified by Patients with and without Dream Enactment Behavior (DEB).** There were no significant differences in traumatic experience histories between PTSD patients with or without DEB.

|                                | <b>Domestic Abuse</b> | <b>Sexual Assault</b> | <b>Childhood Abuse</b> | <b>Military Veteran</b> | <b>Car Accident</b> | <b>Other/Unknown</b> |
|--------------------------------|-----------------------|-----------------------|------------------------|-------------------------|---------------------|----------------------|
| <b>Total Subjects (n)</b>      | 5                     | 10                    | 5                      | 4                       | 4                   | 8                    |
| <b>PTSD Group, No DEB (n)</b>  | 3                     | 2                     | 4                      | 1                       | 3                   | 5                    |
| <b>PTSD with DEB Group (n)</b> | 2                     | 8                     | 1                      | 3                       | 1                   | 3                    |

**Supplemental Table 2. Clinical Historical and Polysomnographic Characteristics of Patients with PTSD with and without Dream Enactment Behavior (DEB).**

|                                                 | <b>Onset After<br/>Combat or<br/>other<br/>traumatic<br/>experience<br/>(n)</b> | <b>History of<br/>altered<br/>dream<br/>mentation<br/>that is<br/>related to<br/>prior<br/>experience<br/>(n)</b> | <b>Self or<br/>witnessed<br/>reports of<br/>disruptive<br/>nocturnal<br/>behaviors<br/>(n)</b> | <b>Autonomic<br/>hyperarousal<br/>on PSG<br/>monitoring<br/>(n)</b> | <b>Dream<br/>Enactment<br/>behavior<br/>(n)</b> |
|-------------------------------------------------|---------------------------------------------------------------------------------|-------------------------------------------------------------------------------------------------------------------|------------------------------------------------------------------------------------------------|---------------------------------------------------------------------|-------------------------------------------------|
| <b>Total<br/>PTSD<br/>Subjects<br/>(n=36)</b>   | 10 (28%)                                                                        | 11 (31%)                                                                                                          | 17 (47%)                                                                                       | 0                                                                   | 18 (50%)                                        |
| <b>PTSD<br/>Group,<br/>No DEB<br/>(n =18)</b>   | 3 (17%)                                                                         | 2 (11%)                                                                                                           | 2 (11%)                                                                                        | 0                                                                   | 0                                               |
| <b>PTSD<br/>with DEB<br/>Group (n<br/>= 18)</b> | 7 (39%)                                                                         | 9 (50%)                                                                                                           | 15 (83%)                                                                                       | 0                                                                   | 18 (100%)                                       |

**Supplemental Table 3. PTSD Patients with and without Dream Enactment Behavior (DEB) Meeting RBD or 95<sup>th</sup> Normative Percentile RSWA Criteria at the Time of PSG**

|                                   | <b>RBD RSWA Threshold Met or Exceeded (n)</b> | <b>95<sup>th</sup> Normative Percentile RSWA Met or Exceeded (n)</b> |
|-----------------------------------|-----------------------------------------------|----------------------------------------------------------------------|
| <b>Total PTSD Subjects (n=36)</b> | 34 (94%)                                      | 32 (89%)                                                             |
| <b>PTSD Group, No DEB (n=18)</b>  | 16 (89%)                                      | 14 (78%)                                                             |
| <b>PTSD with DEB Group (n=18)</b> | 18 (100%)                                     | 18 (100%)                                                            |

**Supplemental Table 4. Comparative Normative RSWA Percentiles Between PTSD Patients with and without Dream Enactment Behavior (DEB), Idiopathic/Isolated RBD Patients, and Controls.**

|                                          | <b>Control <sup>A</sup></b> | <b>PTSD <sup>B</sup></b> | <b>PTSD+DEB <sup>C</sup></b> | <b>iRBD <sup>D</sup></b> | <b>P &lt; 0.05</b>        | <b>P &lt; 0.025</b>  |
|------------------------------------------|-----------------------------|--------------------------|------------------------------|--------------------------|---------------------------|----------------------|
| <b>Average SM Duration (Percentile)</b>  | 57.4<br>(29.3)              | 64.2<br>(38.9)           | 67.7 (21.5)                  | 93.3<br>(14.3)           | D > A,B,C                 | D > A,B,C            |
| <b>Average AT Duration (Percentile)</b>  | 52.1<br>(27.2)              | 62.1<br>(29.8)           | 81.3 (25.4)                  | 89.1<br>(10.3)           | C,D > A<br>D > B<br>C > B | C,D > A<br>D > B     |
| <b>SM Phasic Density (Percentile)</b>    | 51.7<br>(29.7)              | 85.2<br>(18.9)           | 94.8 (11.6)                  | 94.5<br>(14.6)           | B,C,D > A<br>D > B        | B,C,D > A            |
| <b>AT Phasic Density (Percentile)</b>    | 52.9<br>(28.4)              | 73.4<br>(32.0)           | 89.6 (24.2)                  | 92.4<br>(10.7)           | B,C,D > A<br>C,D > B      | B,C,D > A<br>C,D > B |
| <b>SM Any Density (Percentile)</b>       | 51.8<br>(29.6)              | 86.1<br>(19.4)           | 92.6 (14.1)                  | 94.5<br>(14.6)           | B,C,D > A<br>D > B        | B,C,D > A            |
| <b>AT Any Density (Percentile)</b>       | 52.9<br>(28.4)              | 73.1<br>(32.4)           | 93.7 (13.7)                  | 92.4<br>(10.7)           | B,C,D > A<br>C,D > B      | B,C,D > A<br>C,D > B |
| <b>SM+AT Phasic Density (Percentile)</b> | 31.9<br>(28.9)              | 60.3<br>(35.7)           | 83.1 (31.5)                  | 89.8<br>(15.3)           | B,C,D > A<br>C,D > B      | B,C,D > A<br>C,D > B |
| <b>SM+AT Any Density (Percentile)</b>    | 31.9<br>(28.9)              | 59.9<br>(35.8)           | 85.7 (26.8)                  | 89.8<br>(15.3)           | B,C,D > A<br>C,D > B      | B,C,D > A<br>C,D > B |

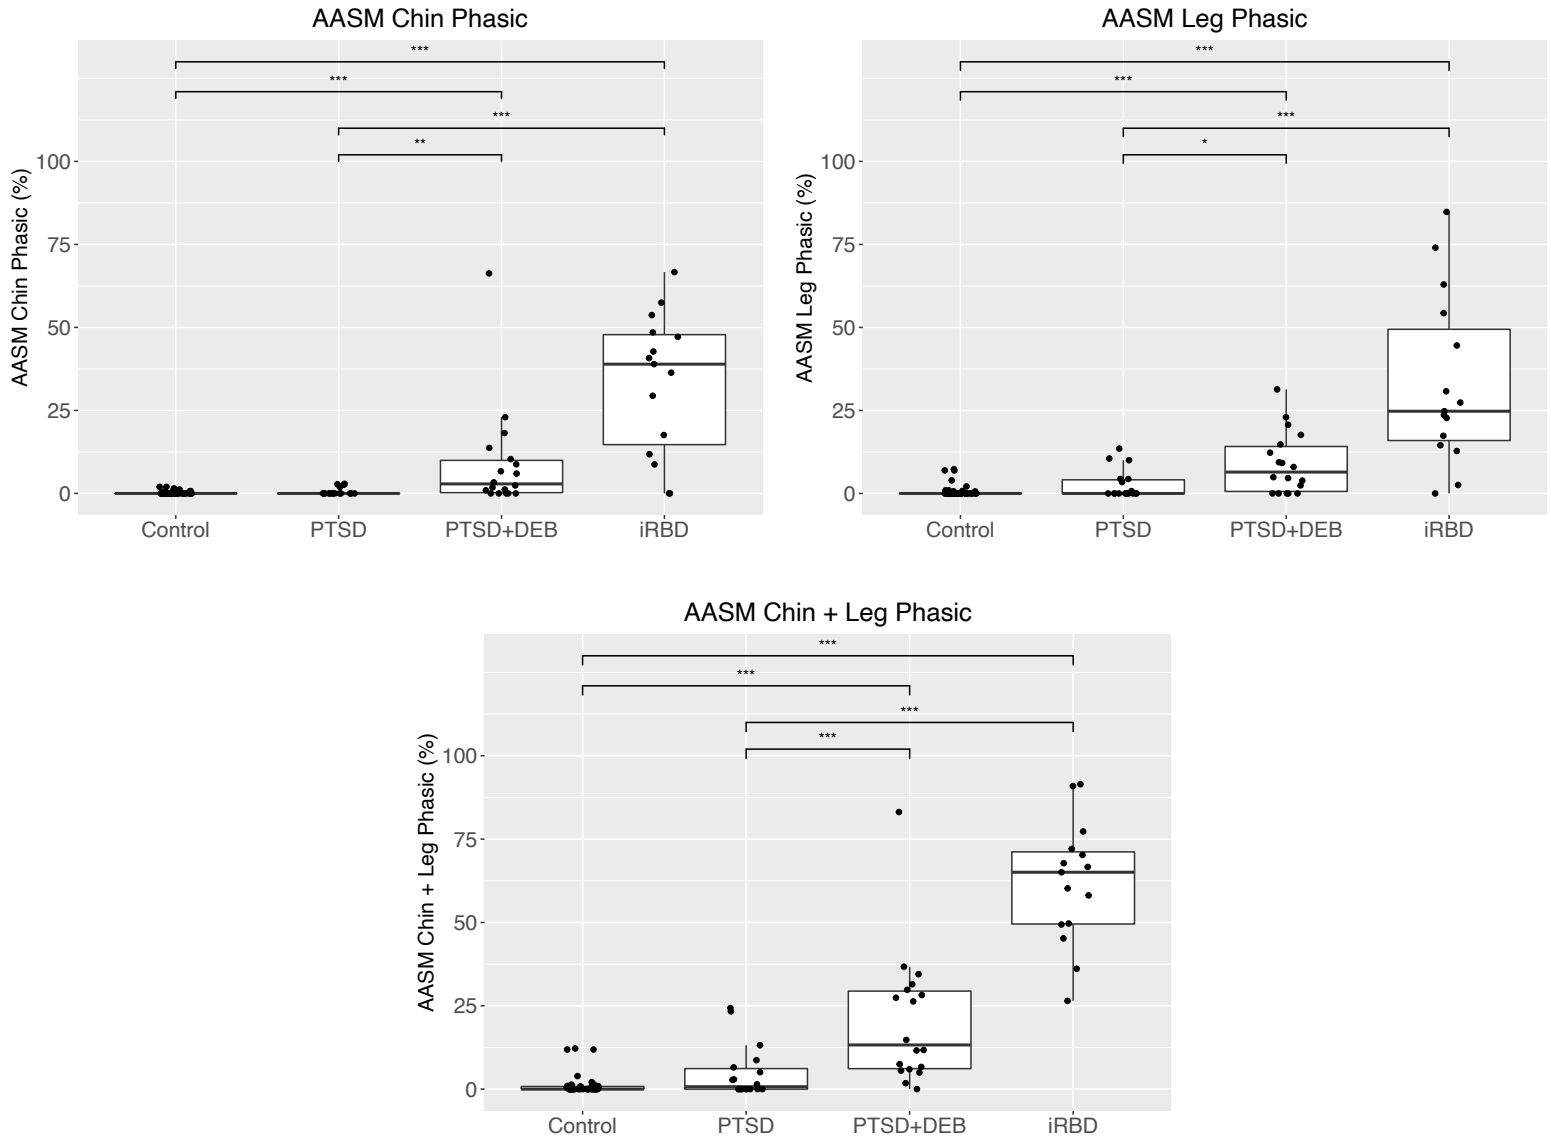

**Supplemental Figure 1. Quantitative REM sleep (REM sleep without atonia) analyses Using the AASM Method for Determination of Phasic Muscle Activity in PTSD Patients with and without Dream Enactment Behavior, IRBD Patients, and Controls.** Shown are group differences between phasic RSWA metrics in the chin (SM, submental) and leg (AT, anterior tibialis) between PTSD patients with and without dream enactment (PTSD+DEB, PTSD) patients, idiopathic/isolated RBD (iRBD) patients, and age- and sex-matched controls. Levels of significant group differences are designated by one asterisk (\*) =  $p < 0.025$ ; two asterisks (\*\*) =  $p < 0.01$ ; and three asterisks (\*\*\*) =  $p < 0.001$ .
